# Supplementary material for: An Investigation of the Sodium Nitroprusside Effects on Serum Lipids in an Animal Model of Schizophrenia by the Magnetic Resonance Study
Source: PubMed Central journal article supplement (PMC11635526; doi:10.1021/acsomega.4c07072), 2024-11-25
Supplement: ao4c07072_si_001.pdf [file ao4c07072_si_001.pdf]

## Supporting Information

### **An investigation of the sodium nitroprusside effects on serum lipids in an animal model for schizophrenia by magnetic resonance study**

João Guilherme de Moraes Pontes<sup>a</sup>, João Victor Silva Nani<sup>b,c</sup>, Banny Silva Barbosa Correia<sup>a</sup>, Tássia Brena Barroso Carneiro Costa<sup>a</sup>, Danijela Stanisic<sup>a</sup>, Mirian A. F. Hayashi<sup>b,c\*</sup>, Ljubica Tasic<sup>a\*</sup>

<sup>a</sup>Laboratório de Química Biológica (LQB), Departamento de Química Orgânica, Instituto de Química, Universidade Estadual de Campinas (UNICAMP), Campinas, SP 13083-970, Brazil, and INCTBio

<sup>b</sup>Departamento de Farmacologia, Escola Paulista de Medicina (EPM), Universidade Federal de São Paulo (UNIFESP), São Paulo, SP 04044-020, Brazil

<sup>c</sup>Instituto Nacional de Ciência e Tecnologia Translacional em Medicina (INCT-TM, CNPq), Ribeirão Preto 14026, Brazil

\*[ljubica@unicamp.br](mailto:ljubica@unicamp.br)

\*[mhayashi@unifesp.br](mailto:mhayashi@unifesp.br)

## Summary

### - PLS-DA using SHR as an animal model

- 2 groups (control · SHR + sNP) (Figure S1) S3
- Box plots (control · SHR + sNP 2.5 mg kg<sup>-1</sup>) (Figure S2) S4
- Box plots (control · SHR + sNP 2.5 mg kg<sup>-1</sup>) (Figure S3) S5
- 3 groups (control · SHR + sNP 2.5 mg kg<sup>-1</sup> · SHR + sNP 5.0 mg kg<sup>-1</sup>) (Fig. S4) S6

### - PLS-DA using Wistar as an animal model

- 2 groups (control · Wistar + sNP) (Figure S5) S7
- Box plots (control · SHR + sNP 2.5 mg kg<sup>-1</sup>) (Figure S6) S8
- Box plots (control · SHR + sNP 2.5 mg kg<sup>-1</sup>) (Figure S7) S9
- 3 groups (control · Wistar + sNP 2.5 mg kg<sup>-1</sup> · Wistar + sNP 5.0 mg kg<sup>-1</sup>)  
(Fig. S8) S10

### - PLS-DA using SHR and Wistar as animal models

- 4 groups (SHR control · Wistar control · SHR + sNP 2.5 mg kg<sup>-1</sup>  
SHR + sNP 5.0 mg kg<sup>-1</sup>) (Figure S9) S11
- 4 groups (Wistar control · SHR control · Wistar + sNP 2.5 mg kg<sup>-1</sup> ·  
Wistar + sNP 5.0 mg kg<sup>-1</sup>) (Figure S10) S12

### - PLS-DA (Wistar + sNP · clozapine · haloperidol) (Figure S11) S13

### - Peak Assignments

- SHR + sNP ( $\delta$  0.50 to 6.00) (Figure S12) S14
- Table S1 S14

## sNP 2.5 mg.kg<sup>-1</sup>

- A-)** ● Control group of SHR (1)  
● SHR + sNP (2.5 mg.kg<sup>-1</sup>) (2)

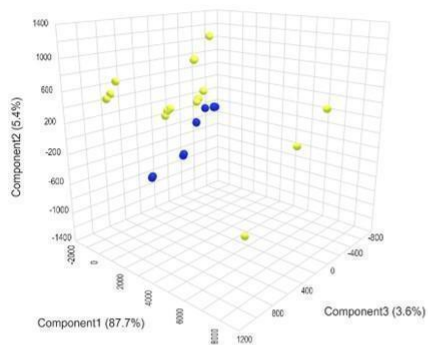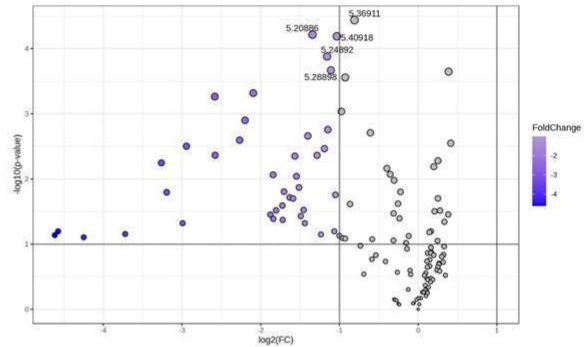

## sNP 5.0 mg.kg<sup>-1</sup>

- B-)** ● Control group of SHR (1)  
● SHR + sNP (5.0 mg.kg<sup>-1</sup>) (3)

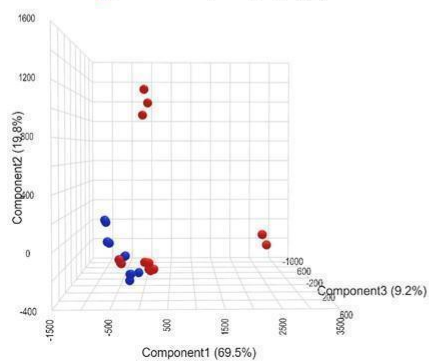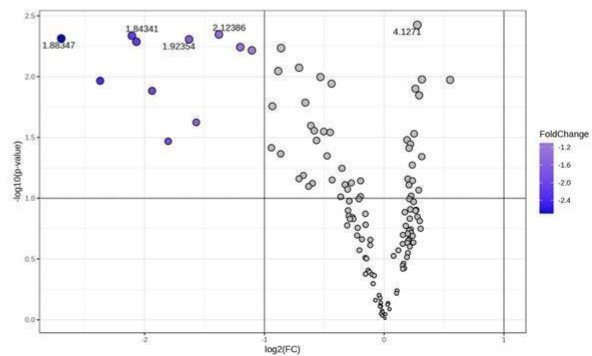

**Figure S1.** PLS-DA of two groups using a spectral range between  $\delta$  0.50-6.00 with the exclusion of  $\delta$  1.50-1.68 and  $\delta$  4.63-4.81. **A)** Scores graph with Volcano plot (40 results with statistical significance –  $p$ -value < 0.05) – 4 samples of untreated SHR control group (blue color, group 1) + 5 samples of SHR + sNP 2.5 mg kg<sup>-1</sup> (yellow color, group 2). **B)** Scores graph with Volcano plot (11 results with statistical significance) – 4 samples of untreated SHR control group (blue color, group 1) + 5 samples of SHR + sNP 5.0 mg.kg<sup>-1</sup> (red color, group 3).

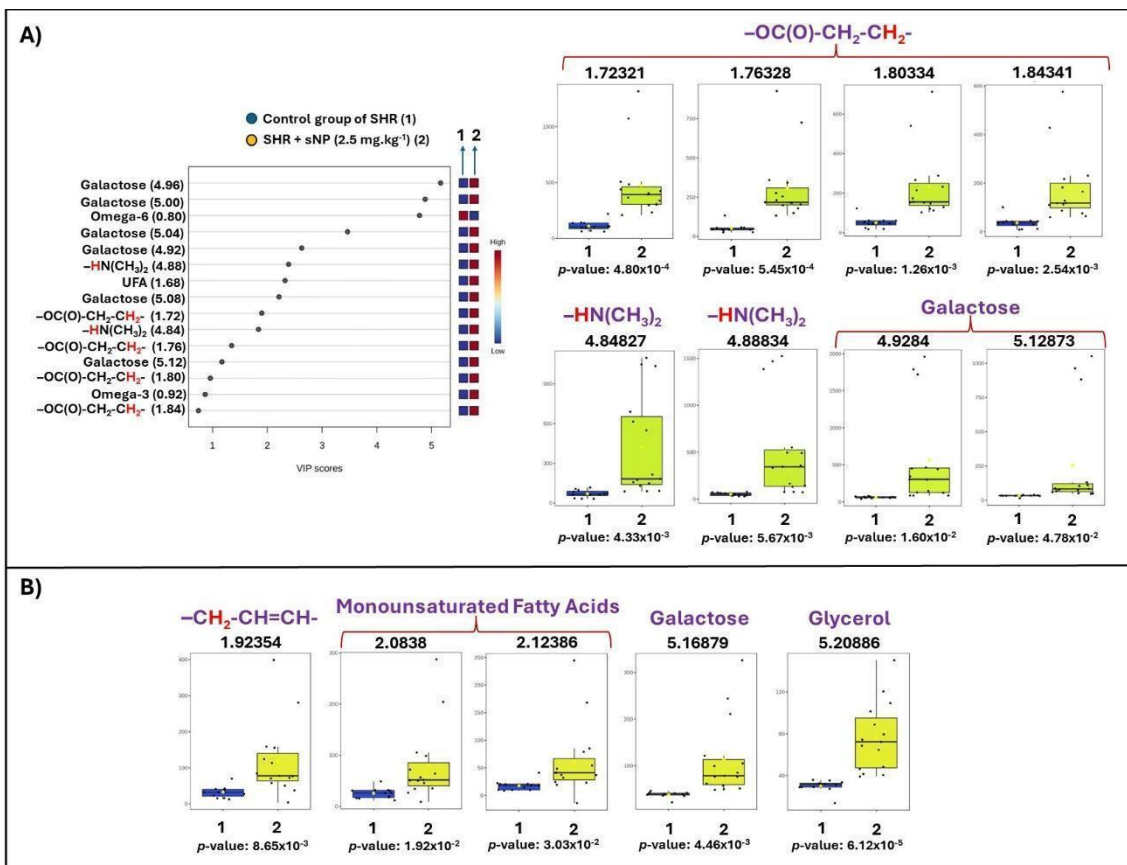

**Figure S2. A)** VIP scores graph of untreated SHR control group (blue color, group 1) · SHR + sNP 2.5 mg kg<sup>-1</sup> (yellow color, group 2) with box plots with  $p$ -values < 0.05. **B)** Some other box plots with statistical significance on the spectral range between  $\delta$  0.50-6.00. Abbreviation: UFA – unsaturated fatty acids. The NMR peak assignments were done based on Correia *et al.* 2021<sup>19</sup> and Tynkkynen, 2012.<sup>28</sup>

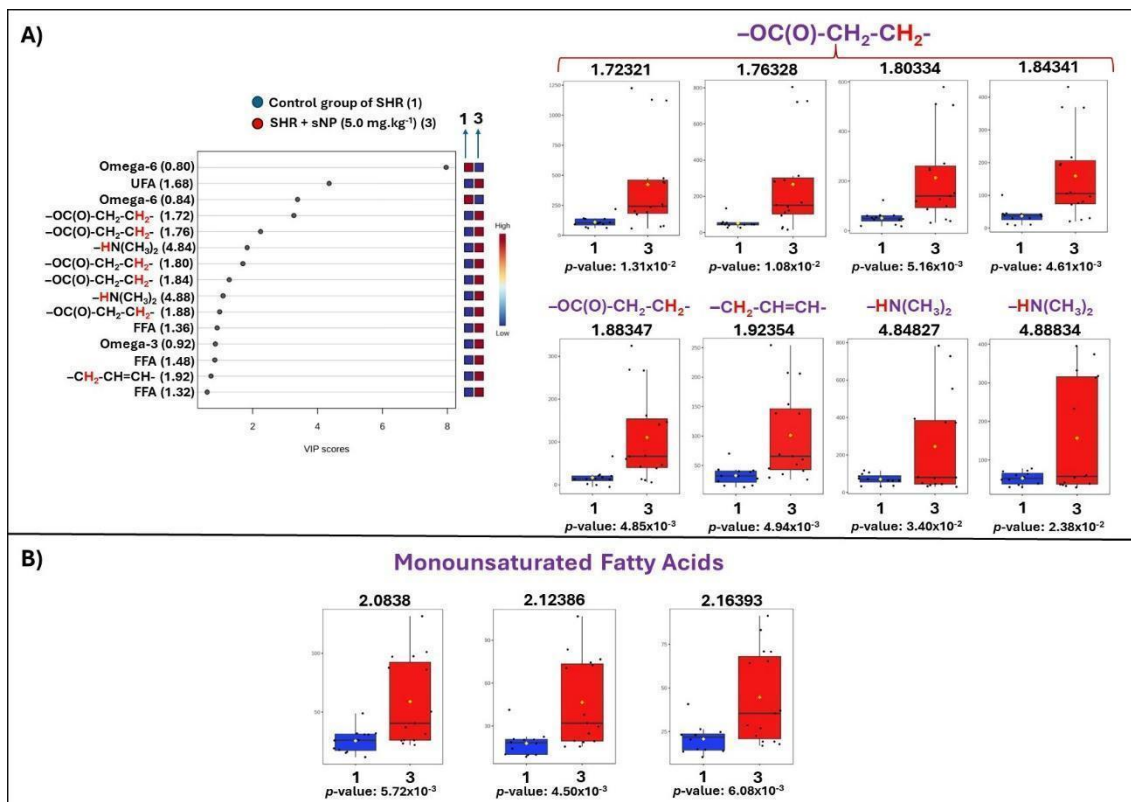

**Figure S3. A)** VIP scores graph of untreated SHR control group (blue color, group 1) · SHR + sNP 5.0 mg.kg<sup>-1</sup> (red color, group 3) with box plots with  $p$ -values < 0.05. **B)** Some other box plots with statistical significance on the spectral range between  $\delta$  0.50-6.00. Abbreviations: FFA – free fatty acids; UFA – unsaturated fatty acids. The NMR peak assignments were done based on Correia *et al.* 2021<sup>19</sup> and Tynkynen, 2012.<sup>28</sup>

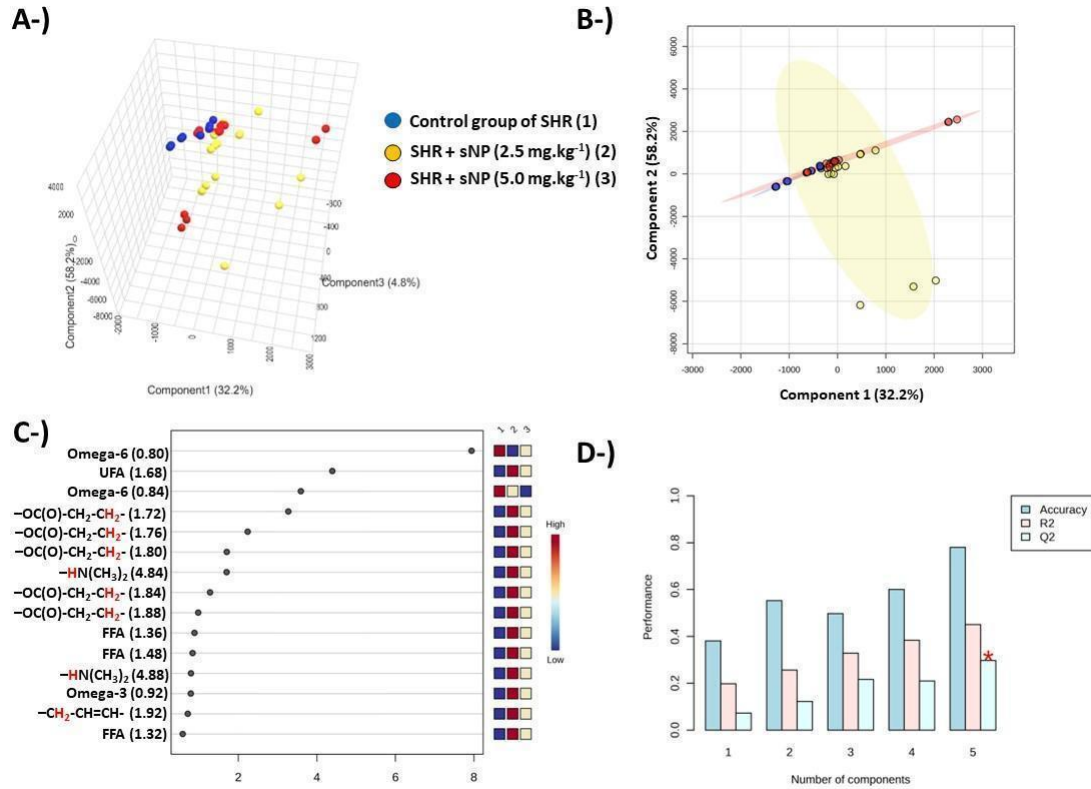

**Figure S4.** PLS-DA of three groups using the following spectral range  $\delta$  0.50-6.00 with the exclusion of  $\delta$  1.50-1.68 and  $\delta$  4.63-4.81. **A)** Scores graph – 4 samples of untreated SHR control group (blue color, group 1) + 5 samples of SHR + sNP 2.5 mg.kg<sup>-1</sup> (yellow color, group 2) + 5 samples of SHR + sNP 5.0 mg.kg<sup>-1</sup> (red color, group 3); Scores graph (2D) - PC1 (32.2%) · PC2 (58.2%); **C)** VIP scores. **D)** PLS-DA cross-validation with the accuracy of 78.0%;  $Q^2 = 0.29699$  and  $R^2 = 0.45.072$  using five (5) components. Abbreviations: FFA – free fatty acids; UFA – unsaturated fatty acids.

## sNP 2.5 mg.kg<sup>-1</sup>

- A-)**
- Control group of Wistar (1)
  - Wistar + sNP (2.5 mg.kg<sup>-1</sup>) (2)

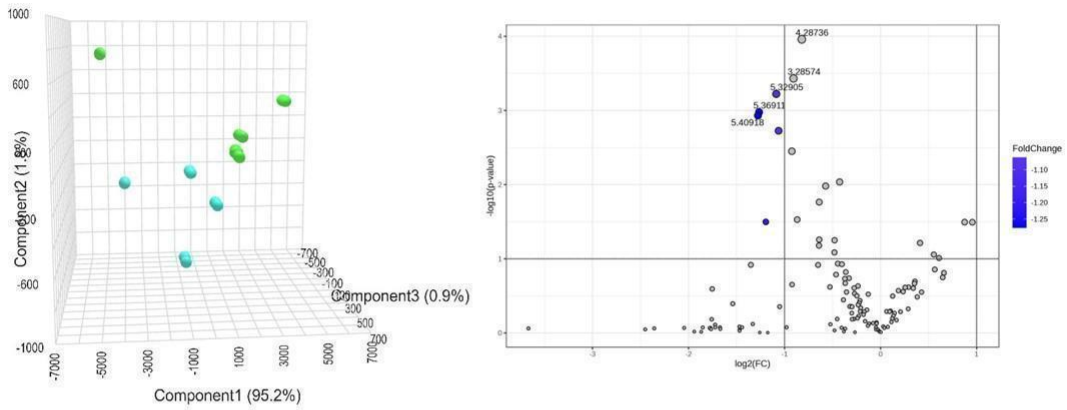

## sNP 5.0 mg.kg<sup>-1</sup>

- B-)**
- Control group of Wistar (1)
  - Wistar + sNP (5.0 mg.kg<sup>-1</sup>) (3)

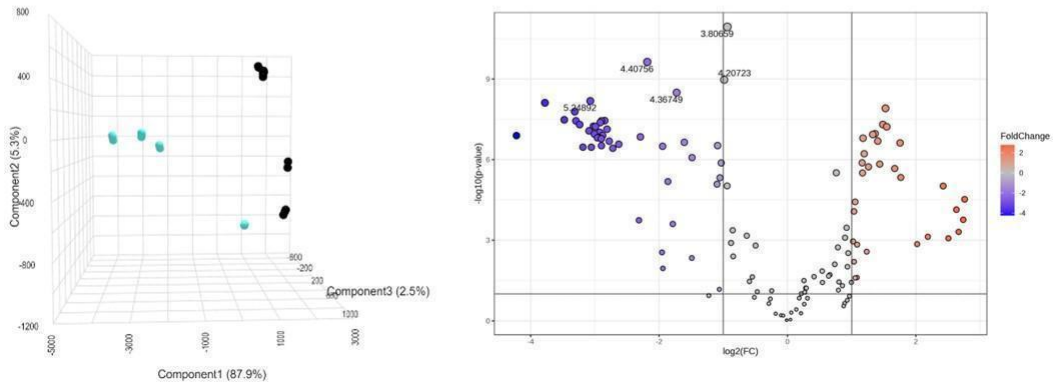

**Figure S5.** PLS-DA of two groups using a spectral range between  $\delta$  0.50-6.00 with the exclusion of  $\delta$  1.50-1.68 and  $\delta$  4.63-4.81. **A)** Scores graph with Volcano plot (5 results with statistical significance –  $p$ -value < 0.05) – 4 samples of untreated Wistar control group (cyan color, group 1) + 5 samples of Wistar + sNP 2.5 mg.kg<sup>-1</sup> (green color, group 2). **B)** Scores graph with Volcano plot (74 results with statistical significance) – 4 samples of untreated Wistar control group (cyan color, group 1) + 5 samples of Wistar + sNP 5.0 mg.kg<sup>-1</sup> (black color, group 3).

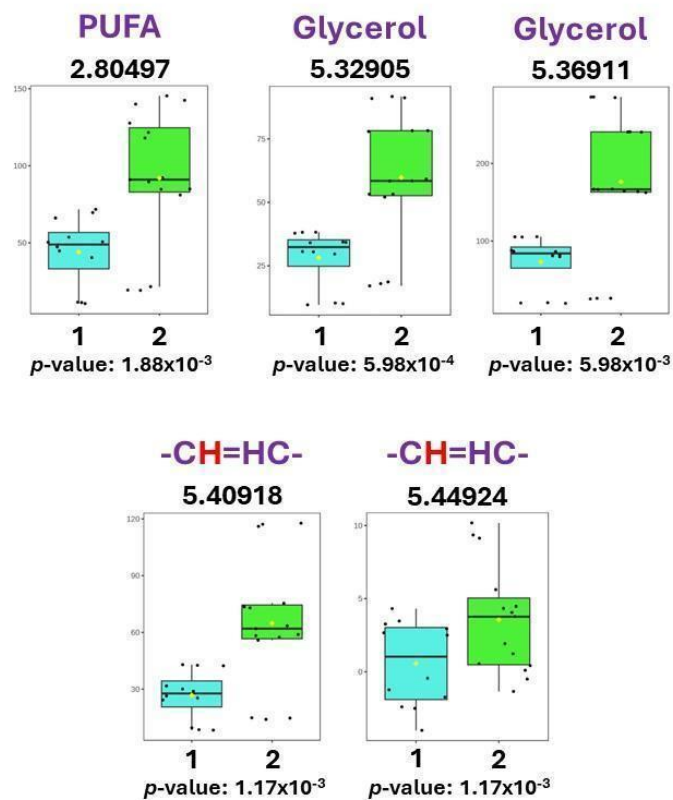

**Figure S6.** Box plots with statistical significance on the spectral range between  $\delta$  0.50-6.00 of untreated Wistar control group (cyan color, group 1) · Wistar + sNP 2.5 mg.kg<sup>-1</sup> (green color, group 2). Abbreviation: PUFA – polyunsaturated fatty acids. NMR peak assignments were done based on Correia *et al.* 2021<sup>19</sup> and Tynkkynen, 2012.<sup>28</sup>



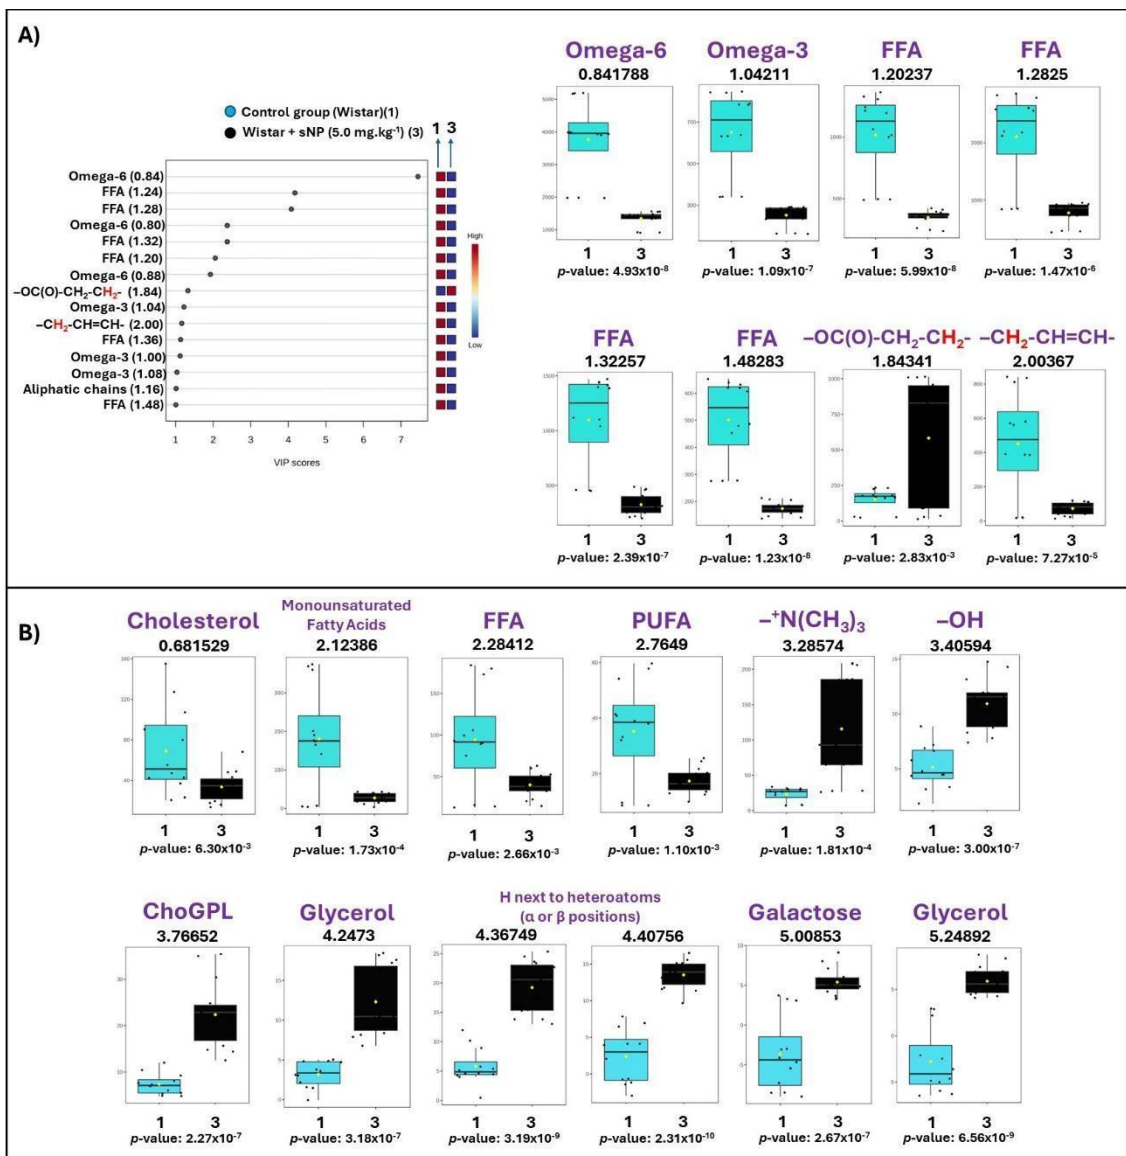

**Figure S7. A)** VIP scores graph of untreated Wistar control group (cyan color, group 1) · Wistar + sNP 5.0 mg.kg<sup>-1</sup> (black color, group 3) with box plots with  $p$ -values < 0.05. **B)** Some other box plots with statistical significance on the spectral range between  $\delta$  0.50-6.00. Abbreviations: ChoGPL - choline glycerophospholipids; FFA – free fatty acids; PUFA – polyunsaturated fatty acids. The NMR peak assignments were done based on Correia *et al.* 2021<sup>19</sup> and Tynkkynen, 2012.<sup>28</sup>

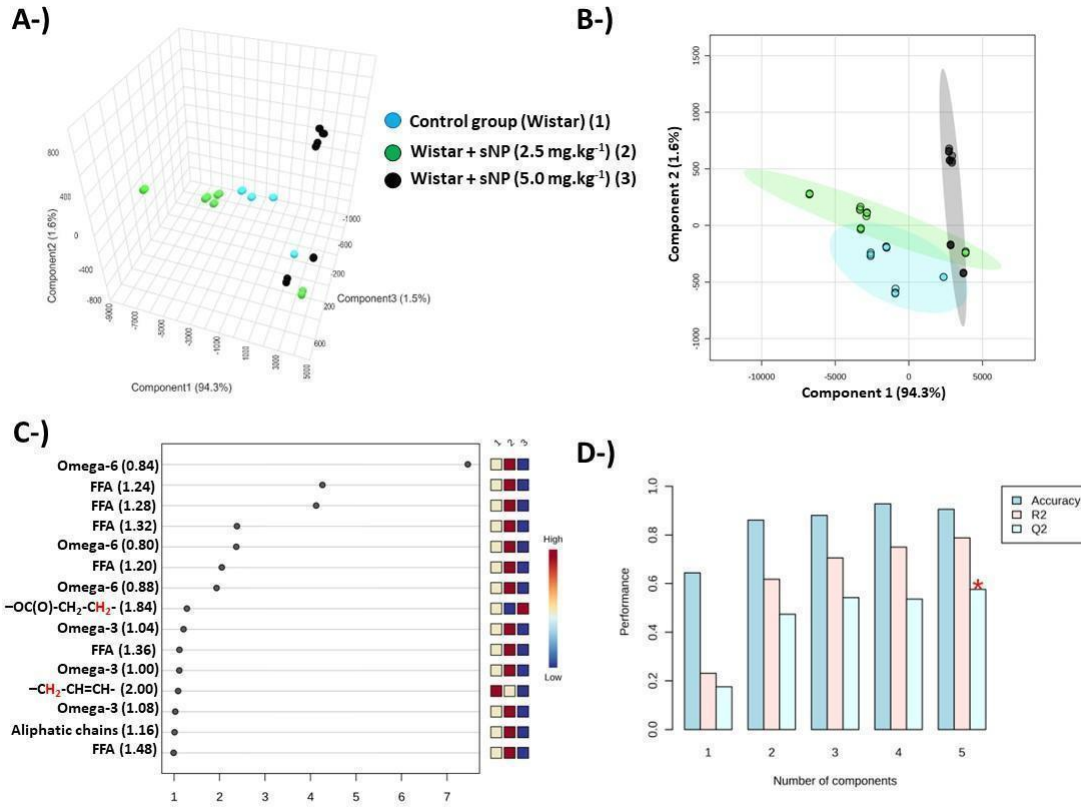

**Figure S8.** PLS-DA of three groups using the spectral range between  $\delta$  0.50-6.00 with the exclusion of  $\delta$  1.50-1.68 and  $\delta$  4.63-4.81. **A)** Scores graph (3D) – 4 samples of untreated Wistar control group (cyan color, group 1) + 5 samples of Wistar + sNP 2.5 mg.kg<sup>-1</sup> (green color, group 2) + 5 samples of Wistar + sNP 5.0 mg.kg<sup>-1</sup> (black color, group 3); **B)** Scores graph (2D) - PC1 (94.3%) · PC2 (1.6%); **C)** VIP scores. **D)** PLS-DA cross-validation with the accuracy of 90.5%;  $Q^2 = 0.57651$  and  $R^2 = 0.7884$  using 5 components. Abbreviation: FFA – free fatty acids.



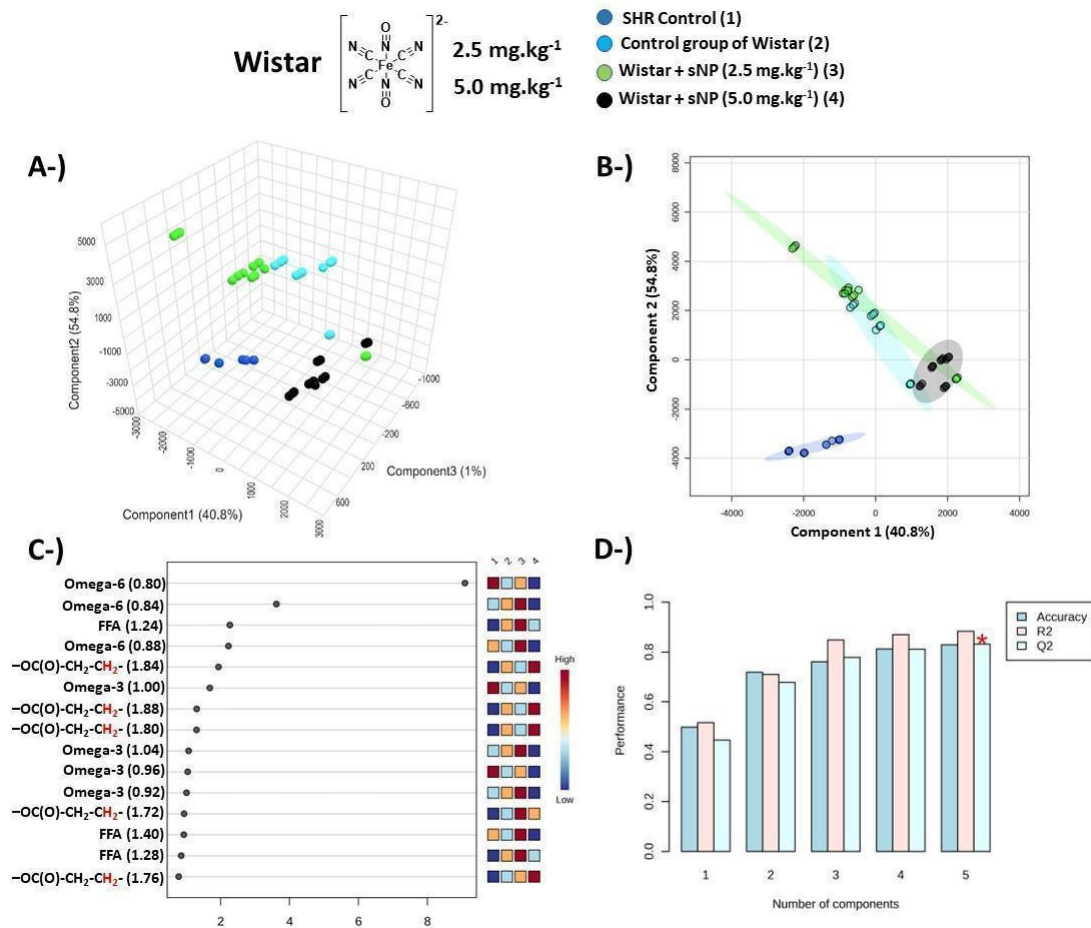

**Figure S10.** PLS-DA of four groups. **A)** Scores graph (3D) – 4 samples of untreated SHR control group (dark blue color, group 1) + 4 samples of untreated Wistar control group (cyan color, group 2) + 5 samples of Wistar + sNP 2.5 mg.kg<sup>-1</sup> (green color, group 3) + 5 samples of Wistar + sNP 5.0 mg.kg<sup>-1</sup> (black color, group 4) using a spectral range between  $\delta$  0.50-6.00 with exclusion of  $\delta$  1.50-1.68 and  $\delta$  4.63-4.81; **B)** Scores graph (2D) - PC1 (40.8%) · PC2 (54.8%); **C)** VIP scores; **D)** PLS-DA cross-validation with the accuracy of 82.9%;  $Q^2 = 0.83141$  and  $R^2 = 0.88297$  using five (5) component. Abbreviation: FFA – free fatty acids.

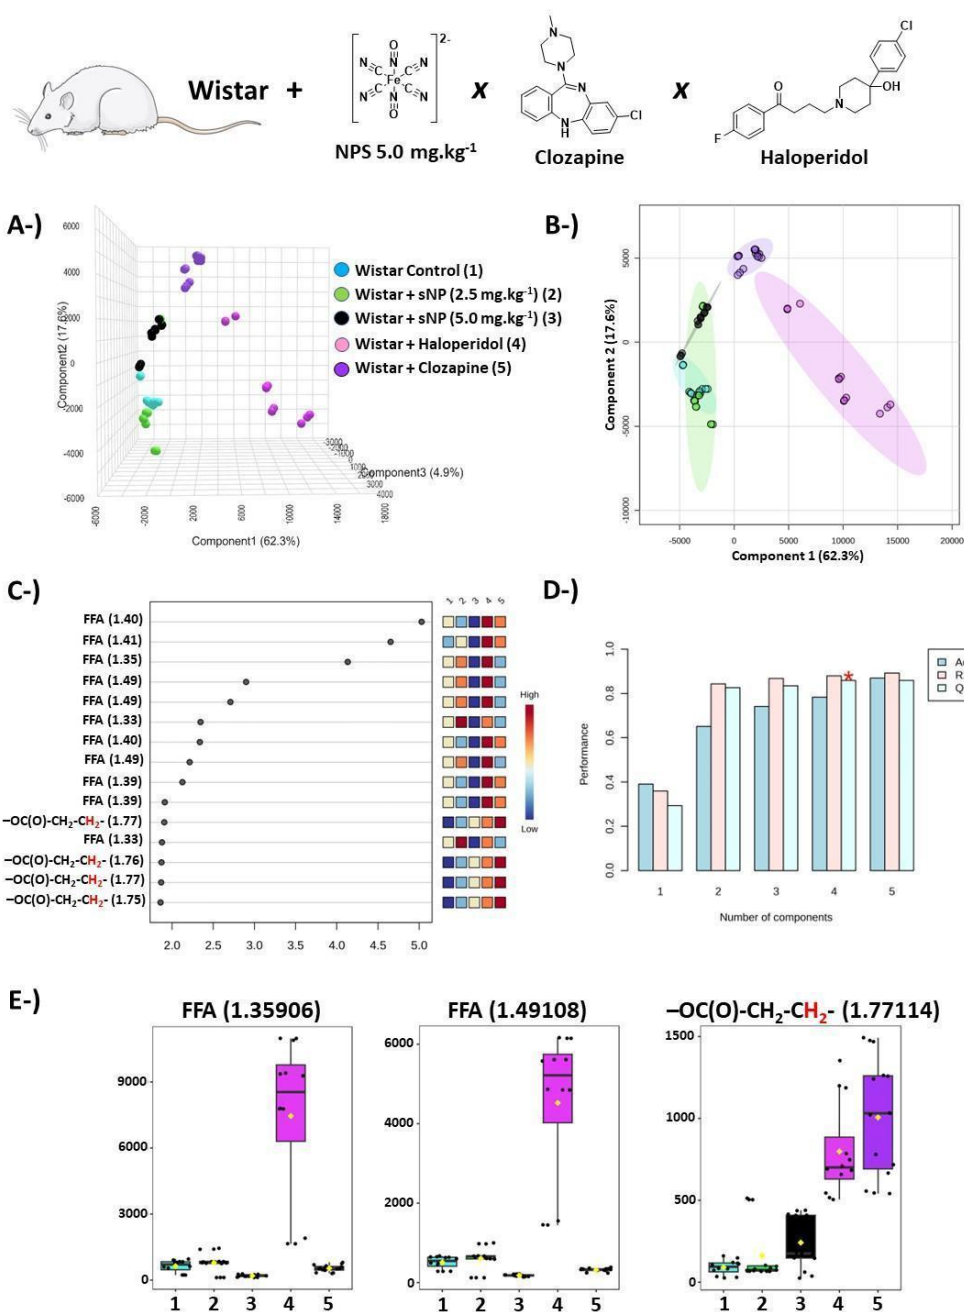

**Figure S11.** PLS-DA of Wistar treated with sNP, haloperidol, or clozapine. **A)** Scores graph (3D) - 4 samples of Wistar untreated control group (cyan color, group 1) + 5 samples of Wistar + sNP 2.5 mg.kg<sup>-1</sup> (green color, group 2) + 5 samples of Wistar + sNP 5.0 mg.kg<sup>-1</sup> (black color, group 3) + 4 samples of Wistar + haloperidol (pink color, group 4) + 5 samples of Wistar + clozapine (purple color, group 5) using a spectral range between  $\delta$  1.30-2.60 with exclusion of  $\delta$  1.50-1.68; **B)** Scores graph (2D) - PC1 (62.3%) · PC2 (17.6%); **C)** VIP scores; **D)** PLS-DA cross-validation with the accuracy of 78.3%;  $Q^2 = 0.8591$  and  $R^2 = 0.8792$  using 4 components. **E)** Box plots of the original concentration of variables 1.35 and 1.49, which were assigned to free fatty acids (FFA) and 1.77 assigned to  $\beta$ -methylene protons of the carbonyl ( $-\text{OC}(\text{O})-\text{CH}_2-\text{CH}_2-$ ). The NMR peak assignments were done based on Correia *et al.* 2021<sup>19</sup> and Tynkkynen, 2012.<sup>28</sup>

## SHR + sNP

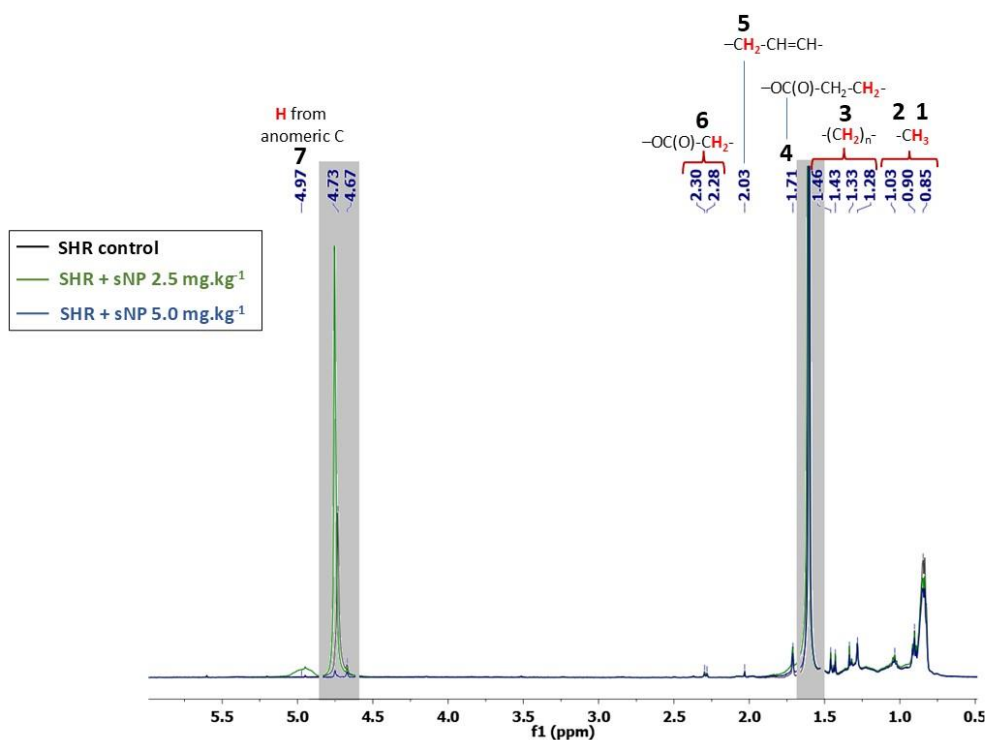

**Figure S12.** Metabolites assignment of  $^1\text{H-NMR}$  spectra of untreated SHR control (black color), SHR + sNP  $2.5 \text{ mg.kg}^{-1}$  (green color), and SHR + sNP  $5.0 \text{ mg.kg}^{-1}$  (blue color) on the spectral range between  $\delta$  1.30 to 2.60. Spectral regions highlighted in gray represent the excluded area in chemometrics analysis –  $\delta$  1.50-1.68 and  $\delta$  4.63-4.81. The numbers from 1 to 7 indicate NMR peak assignments, which are related to protons in bold (Table S1) (Correia *et al.* 2021).<sup>19</sup>

**Table S1.**  $^1\text{H-NMR}$  peak assignments (Correia *et al.* 2021)<sup>19</sup>

| Peak | Chemical shift (ppm) | Assignment                                                                               |
|------|----------------------|------------------------------------------------------------------------------------------|
| 1    | 0.75-1.00            | <b>-CH<sub>3</sub></b> protons of saturated, oleic, and linoleic acyls (omega-6)         |
| 2    | 0.93-1.02            | <b>-CH<sub>3</sub></b> protons of the linolenic chain (omega-3)                          |
| 3    | 1.20-1.50            | Methylene protons of aliphatic chains <b>-(CH<sub>2</sub>)<sub>n</sub></b>               |
| 4    | 1.50-1.75            | $\beta$ -methylene protons of the carbonyl <b>-OC(O)-CH<sub>2</sub>-CH<sub>2</sub>-</b>  |
| 5    | 1.95-2.10            | Methylene protons in the $\alpha$ position of double bonds <b>-CH<sub>2</sub>-CH=CH-</b> |
| 6    | 2.20-2.50            | Methylene protons in the carbonyl $\alpha$ position <b>-OC(O)-CH<sub>2</sub>-</b>        |
| 7    | 5.00                 | Anomeric carbon protons of galactose                                                     |
